# Supplementary material
Source: publisher site journal article supplement (https://www.dovepress.com/article/418099)
Supplement: Supplementary file 1 [file get_supplementary_file.php]

**Supplement Tables**

**Supplement Table 1. The clinical data of patients and the number of CFUs**

| **Cases** | **Gender** | **Age** | **gingival tissues** | **PD (mm)** | **CAL (mm)** | **PI** | **BOP (100%)** | **CFUs/1000 cells** | **CFUs for further experiments** |
| --- | --- | --- | --- | --- | --- | --- | --- | --- | --- |
| 1 | M | 49 | periodontitis | 6 | 4 | 2 | 100 | 81 | 2 |
| 2 | F | 61 | periodontitis | 8.5 | 5.5 | 3 | 100 | 62 | 2 |
| 3 | M | 71 | periodontitis | 6 | 8.5 | 3 | 100 | 101 | 1 |
| 4 | F | 48 | periodontitis | 5.5 | 3.5 | 3 | 100 | 74 | 1 |
| 5 | M | 36 | periodontitis | 4.5 | 4.5 | 2 | 100 | 61 | 1 |
| 6 | M | 62 | periodontitis | 8.5 | 6.5 | 3 | 100 | 76 | 1 |
| 7 | F | 39 | periodontitis | 3.5 | 4 | 2 | 100 | 49 | 2 |
| 8 | M | 58 | periodontitis | 4 | 8 | 3 | 100 | 99 | 1 |
| 9 | F | 65 | periodontitis | 9 | 7.5 | 2 | 100 | 51 | 1 |
| 10 | M | 46 | periodontitis | 5 | 5 | 2 | 100 | 33 | 2 |
| 11 | F | 57 | periodontitis | 5.5 | 3.5 | 3 | 100 | 77 | 3 |
| 12 | F | 56 | periodontitis | 4 | 6 | 3 | 100 | 103 | 1 |
| 13 | M | 35 | periodontitis | 3.5 | 3 | 3 | 100 | 43 | 2 |
| 14 | F | 40 | periodontitis | 5.5 | 4 | 2 | 100 | 41 | 1 |
| 15 | F | 53 | periodontitis | 7.5 | 7.5 | 3 | 100 | 42 | 2 |
| 16 | F | 54 | periodontitis | 8 | 8.5 | 3 | 100 | 66 | 1 |
| 17 | M | 52 | periodontitis | 6.5 | 6 | 3 | 100 | 38 | 1 |
| 18 | M | 36 | periodontitis | 4 | 6.5 | 3 | 100 | 48 | 2 |
| 19 | M | 33 | gingivitis | 1.5 | 0 | 1 | 100 | 99 | 1 |
| 20 | M | 45 | gingivitis | 2 | 0 | 3 | 100 | 111 | 1 |
| 21 | M | 31 | gingivitis | 2.5 | 0 | 1 | 100 | 97 | 3 |
| 22 | M | 67 | gingivitis | 3 | 0 | 2 | 100 | 56 | 1 |
| 23 | F | 42 | gingivitis | 5.5 | 0 | 1 | 100 | 73 | 2 |
| 24 | F | 52 | gingivitis | 3 | 0 | 2 | 100 | 45 | 1 |
| 25 | M | 60 | gingivitis | 3.5 | 0 | 3 | 100 | 89 | 1 |
| 26 | M | 37 | gingivitis | 2 | 0 | 1 | 100 | 72 | 2 |
| 27 | F | 28 | gingivitis | 4.5 | 0 | 2 | 100 | 69 | 1 |
| 28 | F | 46 | gingivitis | 1.5 | 0 | 3 | 100 | 80 | 2 |
| 29 | F | 56 | gingivitis | 4 | 0 | 2 | 100 | 42 | 2 |
| 30 | F | 37 | gingivitis | 3.5 | 0 | 3 | 100 | 50 | 1 |
| 31 | M | 47 | gingivitis | 3 | 0 | 1 | 100 | 61 | 2 |
| 32 | M | 34 | gingivitis | 4.5 | 0 | 3 | 100 | 57 | 2 |
| 33 | F | 30 | Healthy gingiva | 0.5 | 0 | 0 | 0 | 65 | 1 |
| 34 | M | 43 | Healthy gingiva | 2.5 | 0 | 1 | 0 | 77 | 4 |
| 35 | F | 51 | Healthy gingiva | 1.5 | 0 | 0 | 0 | 82 | 1 |
| 36 | F | 42 | Healthy gingiva | 3 | 0 | 2 | 0 | 48 | 1 |
| 37 | M | 36 | Healthy gingiva | 2.5 | 0 | 0 | 0 | 68 | 1 |
| 38 | F | 67 | Healthy gingiva | 1.5 | 0 | 2 | 0 | 71 | 3 |
| 39 | M | 36 | Healthy gingiva | 1 | 0 | 0 | 0 | 93 | 1 |
| 40 | F | 37 | Healthy gingiva | 2.5 | 0 | 1 | 0 | 41 | 1 |
| 41 | F | 40 | Healthy gingiva | 3 | 0 | 0 | 0 | 59 | 1 |
| 42 | M | 52 | Healthy gingiva | 3 | 0 | 1 | 0 | 88 | 1 |

**Supplement Table 2. Clinical periodontal measurements of samples (median with interquartile range)**

| **Clinical parameters** | **Healthy gingiva**  **(Control)** | **Gingivitis** | **Periodontitis** |
| --- | --- | --- | --- |
| **n** | 10 | 14 | 18 |
| **PD (mm)** | 2.5 (1.5, 2.875) | 3 (2.125, 3.875) | 5.5 (4.125, 7.25) |
| **CAL (mm)** | 0 (0, 0) | 0 (0, 0) | 5.75 (4, 7.25) |
| **PI** | 0.5 (0, 1) | 2 (1, 3) | 3 (2, 3) |
| **BOP (100%)** | 0 (0, 0) | 100 (100, 100) | 100 (100, 100) |

PD, probing depth; CAL, clinical attachment loss; PI, plaque index; BOP, bleeding on probing

**Supplement Table 3. Sequences of CRISPR sgRNA and confirming primers**

| Name | sgRNA sequence (5'-3') | PAM sequences (5'-3') | DSB site in fibronectin (FN) genome (ref|NC_018913.2|) |
| --- | --- | --- | --- |
| sgRNA up-stream-F | GTTACAGACATTGATCGCCCTAA | AGG | 216251686 |
| sgRNA up-stream-R | AACTTAGGGCGATCAATGTCTGT |  |  |
| sgRNA down-stream-F | GTTCTGATTGGAACCCAGTCCAC | AGG | 216251434 |
| sgRNA down-stream-R | AACGTGGACTGGGTTCCAATCAG |  |  |
|  | primers | product containing EDA | product without EDA |
| Primer-down | atagtgggttaattggact | 675 bp | 415 bp |
| Primer-up | agggtaatcacagggag |  |  |

**Supplement Table 4. The primers used for real-time PCR**

| Osteoclastogenesis related genes | forward primers (5'-3') | reverse primers (5'-3') | Gene ID |
| --- | --- | --- | --- |
| EDA+FN | AggACTggCATTCACTgATgTg | gTCACCCTgTACCTggAAACTTg | NM_212482 |
| COX-2 | CCAgTATAAgTgCgATTgTACCC | TCAAAAATTCCggTgTTgAgCA | NM_000963.3 |
| IL-6 | AACCTgAACCTTCCAAAgATgg | TCTggCTTgTTCCTCACTACT | NM_000600.4 |
| IL-17 | CCggAATACCAATACCAATCCC | AggTggATCggTTgTAgTAATCT | NM_002190.2 |
| M-CSF | AgACCTCgTgCCAAATTACATT | AggTgTCTCATAgAAAgTTCggA | NM_000757.5 |
| IL-1α | AgATgCCTgAgATACCCAAAACC | CCAAgCACACCCAgTAgTCT | NM_000575.4 |
| TNF-α | gAggCCAAgCCCTggTATg | CgggCCgATTgATCTCAgC | NM_000594.3 |
| VEGF-A | TTATgCggATCAAACCTCACC | gAAgCTCATCTCTCCTATgTgC | NM_001171623.1 |
| OPG | CACAAATTgCAgTgTCTTTggTC | TCTgCgTTTACTTTggTgCCA | NM_002546.3 |
| RANKL | AgATCgCTCCTCCATgTACCA | gCCTTgCCTgTATCACAAACTT | NM_003839.3 |
| β-actin | CATgTACggTTgCTATCCAggC | CTCCTTAATgTCAcgCACgAT | NM_001101.3 |

**Supplement Table 5. Relative expression of genes in the fibroblasts from healthy gingiva, gingivitis and periodontitis**

| **Osteoclastogenesis related genes** |  | **Relative expression** |  |  |  | **P** |  |
| --- | --- | --- | --- | --- | --- | --- | --- |
|  | **1（Healthy gingiva )** | **2（Gingivitis）** | **3（Periodontitis）** |  | **1/2** | **1/3** | **2/3** |
| EDA+FN | 0.3320±0.3733 | 0.4767±0.4790 | 0.7033±0.5120 |  | 0.8684 | 0.1368 | 0.4232 |
| COX2 | 0.0152±0.0061 | 0.0227±0.0179 | 0.0276±0.0199 |  | 0.1108 | *0.0100 | 0.7924 |
| IL6 | 0.0020±0.0007 | 0.0026±0.0009 | 0.0022±0.0008 |  | *0.0183 | 0.3519 | 0.4000 |
| IL17 | 0.0054±0.0032 | 0.0078±0.0051 | 0.0074±0.0049 |  | 0.2751 | 0.2878 | 0.9996 |
| MCSF | 0.0036±0.0020 | 0.0048±0.0031 | 0.0049±0.0027 |  | 0.0591 | **<0.01 | 0.9788 |
| IL-1α | 0.0151±0.0121 | 0.0193±0.0175 | 0.0260±0.0192 |  | 0.4474 | *0.0201 | 0.4516 |
| TNF-α | 0.0036±0.0031 | 0.0043±0.0035 | 0.0063±0.0053 |  | 0.3179 | *0.0150 | 0.3267 |
| VEGF-A | 0.0023±0.0026 | 0.0050±0.0055 | 0.0064±0.0068 |  | *0.0340 | **<0.01 | 0.7835 |
| OPG | 0.0133±0.0056 | 0.0111±0.0076 | 0.0193±0.0134 |  | 0.8060 | 0.1922 | 0.0539 |
| RANKL | 8.8707E-5±8.5025E-5 | 9.5750E-5±7.4972E-5 | 1.3553E-4±7.1801E-5 |  | 0.3658 | **<0.01 | 0.2332 |
| RANKL/OPG | 0.0071±0.0073 | 0.0146±0.0165 | 0.0130±0.0123 |  | 0.0521 | *0.0150 | 0.9922 |

*P < 0.05; **P < 0.01.

**Supplement Table 6. The total variance explained by the components**

| **Component** | **Initial Eigenvalues** | | | **Extraction Sums of Squared Loadings** | | |
| --- | --- | --- | --- | --- | --- | --- |
| Total | % of Variance | Cumulative % | Total | % of Variance | Cumulative % |
| 1 | 5.8330 | 53 | 53 | 5.8330 | 53.0272 | 53.0272 |
| 2 | 1.2490 | 11.3542 | 64.3814 | 1.2490 | 11.3542 | 64.3814 |
| 3 | 1.1647 | 10.5885 | 74.9699 | 1.1647 | 10.5885 | 74.9699 |
| 4 | 0.7557 | 6.8696 | 81.8395 |  |  |  |
| 5 | 0.5814 | 5.2859 | 87.1254 |  |  |  |
| 6 | 0.4783 | 4.3484 | 91.4737 |  |  |  |
| 7 | 0.3155 | 2.8679 | 94.3416 |  |  |  |
| 8 | 0.2055 | 1.8684 | 96.2101 |  |  |  |
| 9 | 0.1619 | 1.4716 | 97.6816 |  |  |  |
| 10 | 0.1517 | 1.3794 | 99.0611 |  |  |  |
| 11 | 0.1033 | 0.9389 | 100.0000 |  |  |  |

**Supplement Table 7. The percentage of CFUs in each clusters among groups of healthy gingiva, gingivitis and periodontitis**

| **Major Clusters** | **periodontal conditions** | | |  |  |
| --- | --- | --- | --- | --- | --- |
|  | **healthy gingiva** | **gingivitis** | **periodontitis** | **χ2 value** | ***p-*value** |
| 1 | 13(86.67%) | 11(50.00%) | 2(7.14%) |  |  |
| 2 | 0(0) | 2(9.09%) | 2(7.14%) | 28.2632 | **<0.01 |
| 3 | 1(6.67%) | 4(18.18%) | 9(32.14%) |  |  |
| 4 | 1(6.67%) | 5(22.73%) | 15(53.57%) |  |  |

**P < 0.01.

**Supplement Table 8. The percentage of cluster 1, 3 and 4 in the CFUs from gingivitis or periodontitis**

| **Major Clusters** | **Gingivitis** | **Periodontitis** | **χ2 value** | ***p*-value** |
| --- | --- | --- | --- | --- |
| **1** | 11(73.33%) | 2(18.18%) | 7.7212 | **<0.01 |
| **3** | 4(26.67%) | 9(81.82%) |  |  |
| **1** | 11(68.75%) | 2(11.76%) | 11.2108 | **<0.01 |
| **4** | 5(31.25%) | 15(88.24%) |  |  |
| **3** | 4(44.44%) | 9(37.50%) | 0.1322 | 0.7162 |
| **4** | 5(55.56%) | 15(62.50%) |  |  |

The χ2 value among three groups is 12.5853, and *p*-value is **0.0019. **p < 0.01.

**Supplement Table 9. Relative expression of genes among the fibroblasts of cluster 1, 2 and 3**

| **Osteoclastogenesis related genes** |  | **Relative expression** |  |  | **P** |  |
| --- | --- | --- | --- | --- | --- | --- |
|  | **1(Cluster1)** | **2(Cluster2)** | **3(Cluster3)** | **1/2** | **1/3** | **2/3** |
| EDA+FN | 0.2161±0.1405 | 1.1547±0.1268 | 0.1269±0.0.0423 | **<0.01 | 0.0566 | **<0.01 |
| COX2 | 0.0131±0.0030 | 0.0342±0.0097 | 0.0531±0.0111 | 0.1788 | **<0.01 | 0.1801 |
| IL6 | 0.0020±0.0007 | 0.0035±0.0001 | 0.0030±0.0009 | **<0.01 | *0.0175 | 0.4369 |
| IL17 | 0.0053±0.0029 | 0.0191±0.0028 | 0.0088±0.0044 | **<0.01 | 0.1079 | **<0.01 |
| MCSF | 0.0031±0.0012 | 0.0103±0.0004 | 0.0080±0.0017 | **<0.01 | **<0.01 | **<0.01 |
| IL-1α | 0.0146±0.0095 | 0.0414±0.0108 | 0.0447±0.0118 | 0.1059 | **<0.01 | 0.9986 |
| TNF-α | 0.0027±0.0015 | 0.0107±0.0015 | 0.0113±0.0039 | **<0.01 | **<0.01 | 0.9974 |
| VEGF-A | 0.0017±0.0005 | 0.0145±0.0016 | 0.0132±0.0051 | **<0.01 | **<0.01 | 0.9710 |
| OPG | 0.0123±0.0067 | 0.0024±0.0003 | 0.0093±0.0067 | **<0.01 | 0.7442 | *0.0176 |
| RANKL | 5.8473E-5±2.9879E-5 | 6.1300E-5±7.2574E-6 | 2.1484E-4±9.4526E-5 | 0.9993 | **<0.01 | **<0.01 |
| RANKL/OPG | 0.0052±0.0018 | 0.0253±0.0012 | 0.0310±0.0157 | **<0.01 | **<0.01 | 0.7616 |

*P < 0.05; **P < 0.01.

**Supplement Table 10. Relative expression of genes among the fibroblasts of cluster 2, 3 and 4**

| **Osteoclastogenesis related genes** |  | **Relative expression** |  |  | **P** |  |
| --- | --- | --- | --- | --- | --- | --- |
|  | **2(Cluster2)** | **3(Cluster3)** | **4(Cluster4)** | **2/3** | **2/4** | **3/4** |
| EDA+FN | 1.1547±0.1268 | 0.1269±0.0.0423 | 1.1022±0.3158 | **<0.01 | 0.9968 | **<0.01 |
| COX2 | 0.0342±0.0097 | 0.0531±0.0111 | 0.0133±0.0029 | 0.1801 | 0.1811 | **<0.01 |
| IL6 | 0.0035±0.0001 | 0.0030±0.0009 | 0.0019±0.0005 | 0.4369 | **<0.01 | **<0.01 |
| IL17 | 0.0191±0.0028 | 0.0088±0.0044 | 0.0058±0.0030 | **<0.01 | **<0.01 | 0.2519 |
| MCSF | 0.0103±0.0004 | 0.0080±0.0017 | 0.0031±0.0010 | **<0.01 | **<0.01 | **<0.01 |
| IL-1α | 0.0414±0.0108 | 0.0447±0.0118 | 0.0099±0.0109 | 0.9986 | 0.0554 | **<0.01 |
| TNF-α | 0.0107±0.0015 | 0.0113±0.0039 | 0.0024±0.0017 | 0.9974 | **<0.01 | **<0.01 |
| VEGF-A | 0.0145±0.0016 | 0.0132±0.0051 | 0.0018±0.0008 | 0.9710 | **<0.01 | **<0.01 |
| OPG | 0.0024±0.0003 | 0.0093±0.0067 | 0.0251±0.0106 | *0.0176 | **<0.01 | **<0.01 |
| RANKL | 6.1300E-5±7.2574E-6 | 2.1484E-4±9.4526E-5 | 1.1708E-4±3.3815E-5 | **<0.01 | **<0.01 | *0.0159 |
| RANKL/OPG | 0.0253±0.0012 | 0.0310±0.0157 | 0.0058±0.0033 | 0.7616 | **<0.01 | **<0.01 |

*P < 0.05; **P < 0.01.

**Supplement Table 11. Relative expression of genes among the fibroblasts of cluster 1, 3 and 4**

| **Osteoclastogenesis related genes** |  | **Relative expression** |  |  | **P** |  |
| --- | --- | --- | --- | --- | --- | --- |
|  | **1(Cluster1)** | **3(Cluster3)** | **4(Cluster4)** | **1/3** | **1/4** | **3/4** |
| EDA+FN | 0.2161±0.1405 | 0.1269±0.0423 | 1.1022±0.3158 | 0.0566 | **<0.01 | **<0.01 |
| COX2 | 0.0131±0.0030 | 0.0531±0.0111 | 0.0133±0.0029 | **<0.01 | 1.0000 | **<0.01 |
| IL6 | 0.0020±0.0007 | 0.0030±0.0009 | 0.0019±0.0005 | *0.0175 | 0.9280 | **<0.01 |
| IL17 | 0.0053±0.0029 | 0.0088±0.0044 | 0.0058±0.0030 | 0.1079 | 0.9911 | 0.2519 |
| MCSF | 0.0031±0.0012 | 0.0080±0.0017 | 0.0031±0.0010 | **<0.01 | 1.0000 | **<0.01 |
| IL-1α | 0.0146±0.0095 | 0.0447±0.0118 | 0.0099±0.0109 | **<0.01 | 0.5798 | **<0.01 |
| TNF-α | 0.0027±0.0015 | 0.0113±0.0039 | 0.0024±0.0017 | **<0.01 | 0.9888 | **<0.01 |
| VEGF-A | 0.0017±0.0005 | 0.0132±0.0051 | 0.0018±0.0008 | **<0.01 | 0.9999 | **<0.01 |
| OPG | 0.0123±0.0067 | 0.0093±0.0067 | 0.0251±0.0106 | 0.7442 | **<0.01 | **<0.01 |
| RANKL | 5.8473E-5±2.9879E-5 | 2.1484E-4±9.4526E-5 | 1.1708E-4±3.3815E-5 | **<0.01 | **<0.01 | *0.0159 |
| RANKL/OPG | 0.0052±0.0018 | 0.0310±0.0157 | 0.0058±0.0033 | **<0.01 | 0.9772 | **<0.01 |

*P < 0.05; **P < 0.01.

**Supplement Table 12. Relative expression of genes among the co-cultured Cluster 1**

| **n=12** | **a** | **b** | **c** |  | **P** |  |
| --- | --- | --- | --- | --- | --- | --- |
| **Osteoclastogenesis related genes** | **Cluster1** | **Cluster1 (cocultured with Cluster4)** | **Cluster1 (cocultured with EDA knockout Cluster4)** | **a/b** | **a/c** | **b/c** |
| COX2 | 0.0142±0.0080 | 0.0490±0.0109 | 0.0158±0.0036 | **<0.01 | 0.6946 | **<0.01 |
| IL6 | 0.0015±0.0017 | 0.0039±0.0020 | 0.0095±0.0045 | *0.0310 | 0.2292 | 0.0925 |
| IL17 | 0.0051±0.0017 | 0.0067±0.0021 | 0.0095±0.0045 | 0.2131 | 0.0682 | 0.2432 |
| MCSF | 0.0040±0.0024 | 0.0078±0.0022 | 0.0034±0.0024 | *0.0219 | 0.7079 | *0.0128 |
| IL-1α | 0.0205±0.0056 | 0.0359±0.0114 | 0.0027±0.0014 | *0.0219 | 0.1145 | **<0.01 |
| TNF-α | 0.0032±0.0013 | 0.0145±0.0016 | 0.0027±0.0014 | **<0.01 | 0.5341 | **<0.01 |
| VEGF-A | 0.0018±0.0011 | 0.0127±0.0090 | 0.0016±0.0004 | *0.0223 | 0.7623 | *0.0201 |
| OPG | 0.0090±0.0044 | 0.0094±0.0035 | 0.0086±0.0042 | 0.8837 | 0.8929 | 0.7647 |
| RANKL | 5.9403E-5±2.6890E-5 | 2.3324E-4±1.5818E-4 | 6.0448E-5±4.1203E-5 | *0.0359 | 0.9620 | *0.0397 |
| RANKL/OPG | 0.0072±0.0026 | 0.0265±0.0146 | 0.0073±0.0038 | *0.0158 | 0.9627 | *0.0176 |

*P < 0.05; **P < 0.01.

**Supplement Table 13. Relative expression of genes among the cocultured Cluster 3**

| **n=12** | **a** | **b** | **c** |  | **P** |  |
| --- | --- | --- | --- | --- | --- | --- |
| **Osteoclastogenesis related genes** | **Cluster3** | **Cluster3 (cocultured with Cluster4)** | **Cluster3 (cocultured with EDA knockout Cluster4)** | **a/b** | **a/c** | **b/c** |
| COX2 | 0.0498±0.0210 | 0.0578±0.0301 | 0.0153±0.0035 | 0.6334 | **<0.01 | *0.0105 |
| IL6 | 0.0037±0.0005 | 0.0047±0.0012 | 0.0027±0.0009 | 0.1210 | 0.0649 | *0.0165 |
| IL17 | 0.0074±0.0025 | 0.0110±0.0074 | 0.0054±0.0036 | 0.3309 | 0.3373 | 0.1645 |
| MCSF | 0.0075±0.0043 | 0.0093±0.0036 | 0.0049±0.0016 | 0.4857 | 0.2311 | *0.0317 |
| IL-1α | 0.0470±0.0200 | 0.0628±0.0234 | 0.0189±0.0154 | 0.2769 | *0.0319 | **<0.01 |
| TNF-α | 0.0111±0.0048 | 0.0219±0.0132 | 0.0086±0.0130 | 0.1166 | 0.6895 | 0.1386 |
| VEGF-A | 0.0147±0.0037 | 0.0260±0.0085 | 0.0015±0.0005 | *0.0223 | **<0.01 | **<0.01 |
| OPG | 0.0106±0.0047 | 0.0137±0.0051 | 0.0135±0.0053 | 0.3452 | 0.3802 | 0.9653 |
| RANKL | 2.7584E-4±2.2067E-4 | 3.4306E-4±8.7481E-5 | 5.4787E-5±2.5114E-5 | 0.5408 | 0.0502 | **<0.01 |
| RANKL/OPG | 0.0342±0.0277 | 0.0418±0.0147 | 0.0046±0.0017 | 0.5986 | *0.0381 | **<0.01 |

*P < 0.05; **P < 0.01.
